# Supplementary material
Source: PubMed Central journal article supplement (PMC5442638)
Supplement: IAI.00140-17_zii999092052s1.pdf [file IAI.00140-17_zii999092052s1.pdf]

**Table S1** Gene accession numbers for phylogenetic analysis

| <b>Organism</b>                                       | <b>Accession number</b> | <b>Reference</b> |
|-------------------------------------------------------|-------------------------|------------------|
| <i>Streptococcus pyogenes</i> <b>PmtA</b>             | AAZ51785.1              | (1)              |
| <i>Streptococcus agalactiae</i>                       | KLL21255.1              |                  |
| <i>Streptococcus canis</i>                            | WP_003044256.1          |                  |
| <i>Streptococcus dysgalactiae</i>                     | WP_046159323.1          |                  |
| <i>Streptococcus iniae</i>                            | WP_003101088.1          |                  |
| <i>Streptococcus mutans</i>                           | WP_002304112.1          |                  |
| <i>Streptococcus pneumoniae</i>                       | CVM74562.1              |                  |
| <i>Streptococcus porcinus</i>                         | WP_003083554.1          |                  |
| <i>Streptococcus suis</i>                             | WP_029187041.1          |                  |
| <i>Streptococcus thermophilus</i>                     | WP_049555285.1          |                  |
| <i>Enterococcus faecalis</i>                          | WP_034863010.1          |                  |
| <i>Enterococcus faecium</i>                           | WP_058138288.1          |                  |
| <i>Listeria monocytogenes</i> <b>FrvA</b>             | WP_014929421.1          | (2-4)            |
| <i>Bacillus subtilis</i> <b>PfeT</b>                  | CUB56232.1              | (4, 5)           |
| <i>Mycobacterium smegmatis</i> <b>CtpD</b>            |                         | (6)              |
| <i>Sulfitobacter</i> sp. <i>NAS 14.1</i> <b>sCoaT</b> | ZP_00964573.1           | (7)              |
| <i>Cupriavidus metallidurans</i> <b>CzcP</b>          | WP_011514822.1          | (8)              |
| <i>Mycobacterium tuberculosis</i> <b>CtpD</b>         | WP_057125145.1          | (9)              |
| <i>Mycobacterium tuberculosis</i> <b>CtpJ</b>         | WP_031727628.1          | (9)              |
| <i>Chlamydia trachomatis</i>                          | CRH88065.1              |                  |

**Table S2** List of strains and plasmids used in this study

| <b>Bacterial strains</b>                 | Description                                                                                    | Reference  |
|------------------------------------------|------------------------------------------------------------------------------------------------|------------|
| <i>Escherichia coli</i>                  |                                                                                                |            |
| MC1061                                   | <i>E. coli</i> laboratory cloning strain                                                       | (10)       |
| Top10                                    | <i>E. coli</i> laboratory cloning strain                                                       |            |
| <i>Streptococcus pyogenes</i>            |                                                                                                |            |
| 5448                                     | <i>S. pyogenes</i> invasive MIT1 strain                                                        | (11)       |
| 5448 $\Delta$ <i>pmtA</i>                | <i>S. pyogenes</i> 5448 $\Delta$ <i>pmtA</i> :: <i>km</i> <sup>R</sup> deletion mutant         | This study |
| 5448 $\Delta$ <i>pmtA</i> :: <i>pmtA</i> | <i>S. pyogenes</i> 5448 <i>pmtA</i> complemented strain                                        | This study |
| 5448 $\Delta$ <i>perR</i>                | <i>S. pyogenes</i> 5448 $\Delta$ <i>perR</i> :: <i>spec</i> <sup>R</sup> deletion mutant       | (12)       |
| 5448 $\Delta$ <i>perR</i> :: <i>perR</i> | <i>S. pyogenes</i> 5448 $\Delta$ <i>perR</i> complemented strain                               | (12)       |
| <b>Plasmids</b>                          | Description                                                                                    | Reference  |
| pHY304                                   | Temperature sensitive shuttle plasmid:: <i>Em</i> <sup>R</sup>                                 | (13)       |
| pJRS233                                  | Temperature sensitive shuttle plasmid:: <i>Em</i> <sup>R</sup>                                 | (14)       |
| pUC4 $\Omega$ Km2                        | Template for <i>Km</i> <sup>R</sup>                                                            | (15)       |
| pHY304- <i>pmtA</i> -KO                  | pHY304 + <i>pmtA</i> knockout construct inserted at the <i>Xho</i> I and <i>Bam</i> HI site    | This study |
| pJRS233- <i>pmtA</i>                     | pJRS233 + <i>pmtA</i> complement construct inserted at the <i>Xho</i> I and <i>Bam</i> HI site | This study |

**Table S3** List of primers used in this study

| <b>Primer</b>                                                   | <b>Sequence (5'-3')</b>                             |                          |
|-----------------------------------------------------------------|-----------------------------------------------------|--------------------------|
| <i>Deletion mutation and reverse complementation constructs</i> |                                                     |                          |
| pmtA-KO-1                                                       | CCCGGCTCGAGTTGATAGCGACAAGGTTCTTTTT                  | <b>XhoI</b>              |
| pmtA-KO-2                                                       | CAAAGTTGGCGTATAACATAACCGATAGCTGCCAAAATCAT           | <i>Km<sup>R</sup></i> 5' |
| pmtA-KO-3                                                       | TTACTGGATGAATTGTTTTAGAGAACGAACCGCCAATTATG           | <i>Km<sup>R</sup></i> 3' |
| pmtA-KO-4                                                       | GGGCCC <b>GATCC</b> CTTTCATAAGTCTTACTATTATTATAAACAC | <b>BamHI</b>             |
| km-F                                                            | TATGTTATACGCCAACTTTG                                |                          |
| km-R                                                            | CTAAAACAATTCATCCAGTAA                               |                          |
| <i>Gene expression studies</i>                                  |                                                     |                          |
| pmtA-RT-F                                                       | GAAAAGCAAAACCGCCACCT                                |                          |
| pmtA-RT-R                                                       | GGGCACATGGTGAAGCTACT                                |                          |
| gyrA-RT-F                                                       | GAAGTGATCCCTGGACCTGA                                |                          |
| gyrA-RT-R                                                       | CCCGACCTGTTTGAGTTGTT                                |                          |

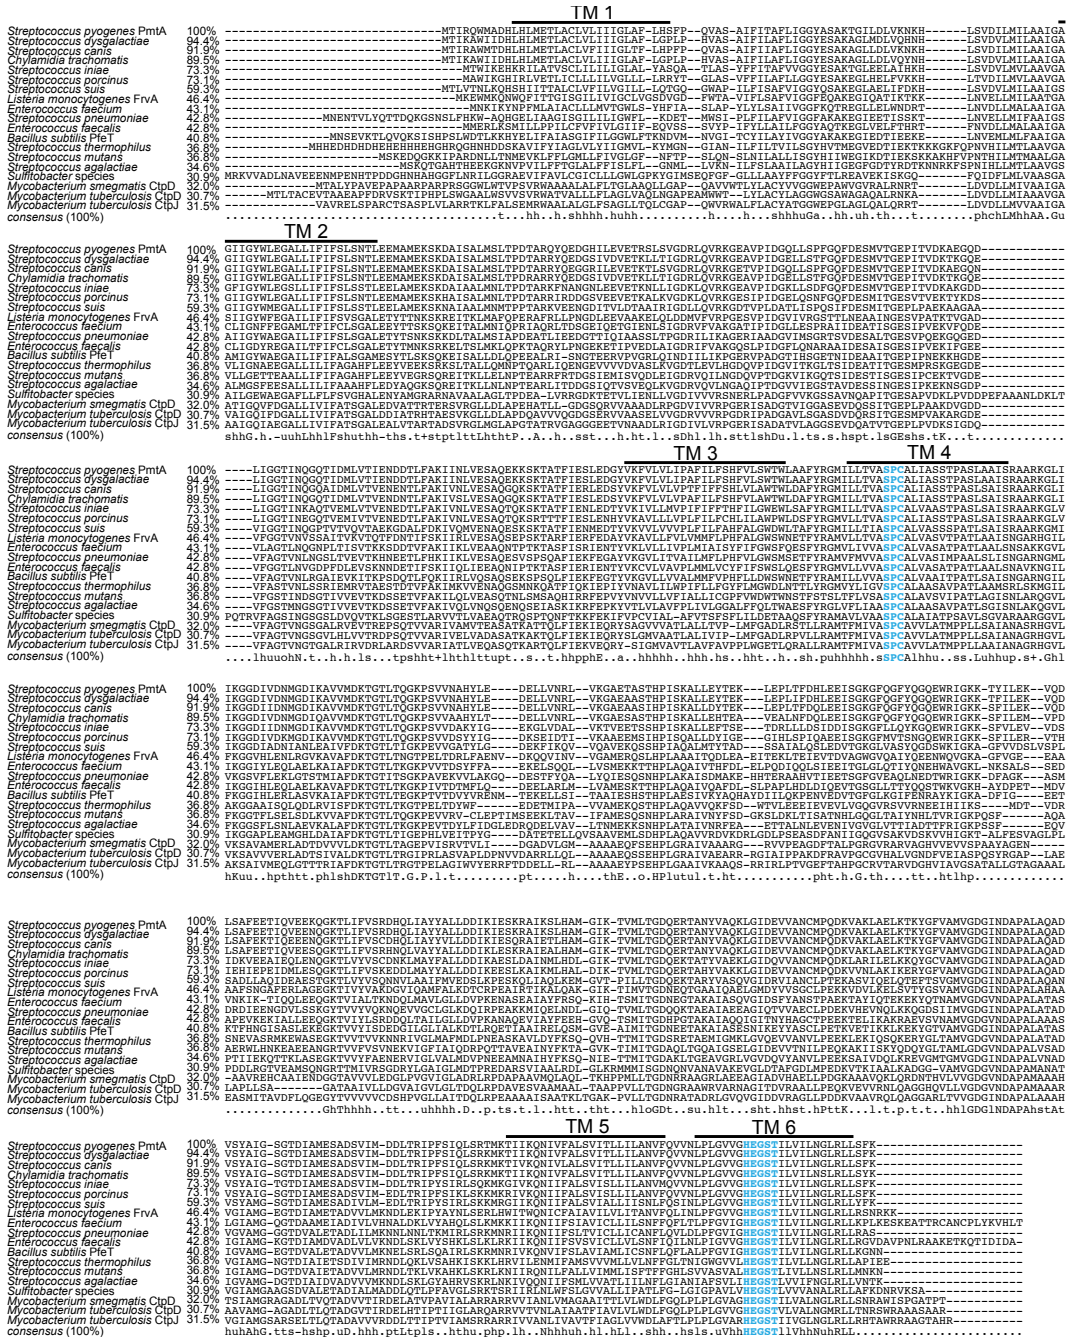

**Figure S1:** Multiple sequence alignment of *S. pyogenes* PmtA and homologous P<sub>1-B4</sub> type ATPase family sequences. Relative location of six core purported transmembrane helices based on the coordinates from *Bacillus subtilis* PfeT transmembrane profiles (reference). Key conserved motifs within TM helices 4 and 6 are highlighted in blue and the essential serine within TM 6 is highlighted in red. Consensus patterns based on discriminating equivalence class at a 100% threshold are

indicated under the alignment. Percent amino acid identity relative to *S. pyogenes*  
PmtA (TM 1-6) are indicated next to the species name.

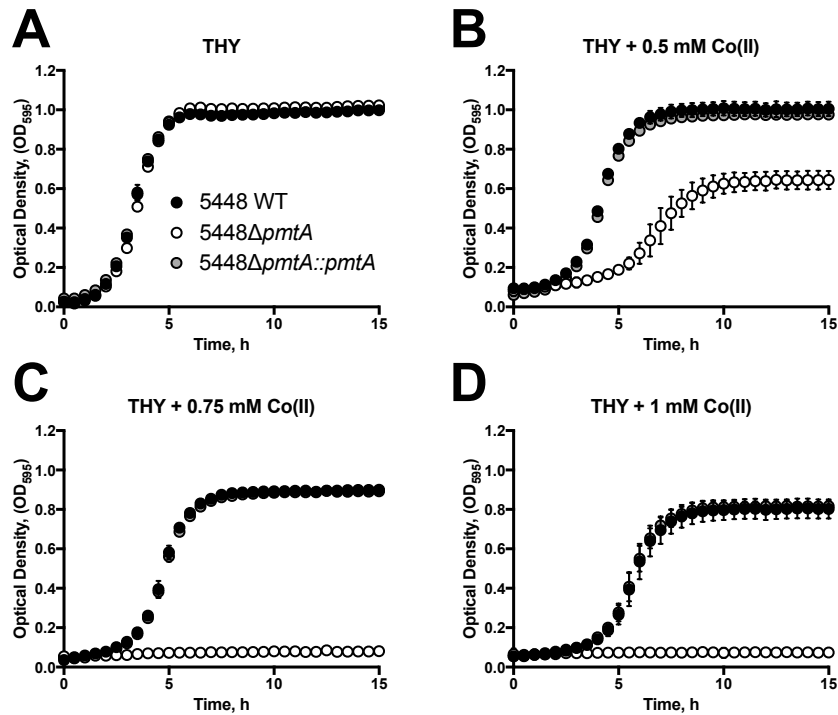

**Figure S2:** Growth analysis in the presence of Co(II). Overnight cultures of 5448 WT (black circles), 5448 $\Delta$ pmtA (open circles) and 5448 $\Delta$ pmtA::pmtA (grey circles) were diluted to OD<sub>600</sub> = 0.05 into THY broth alone (A) or THY broth with 0.5 mM (B), 0.75 mM (C) or 1 mM (D) Co(II). Growth was monitored at 37°C by optical density recording at 595 nm (OD<sub>595</sub>). Graphs represent mean  $\pm$  standard deviation of 3 independent biological replicates.

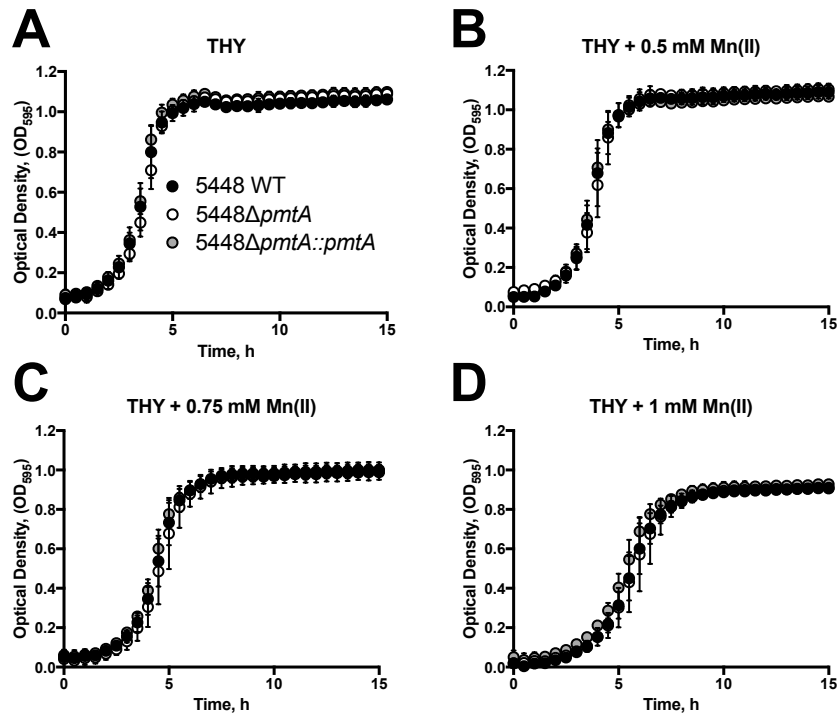

**Figure S3:** Growth analysis in the presence of Mn(II). Overnight cultures of 5448 WT (black circles), 5448 $\Delta$ pmtA (open circles) and 5448 $\Delta$ pmtA::pmtA (grey circles) were diluted to OD<sub>600</sub> = 0.05 into THY broth alone (A) or THY broth with 0.5 mM (B), 0.75 mM (C) or 1 mM (D) Mn(II). Growth was monitored at 37°C by optical density recording at 595 nm (OD<sub>595</sub>). Graphs represent mean  $\pm$  standard deviation of 3 independent biological replicates.

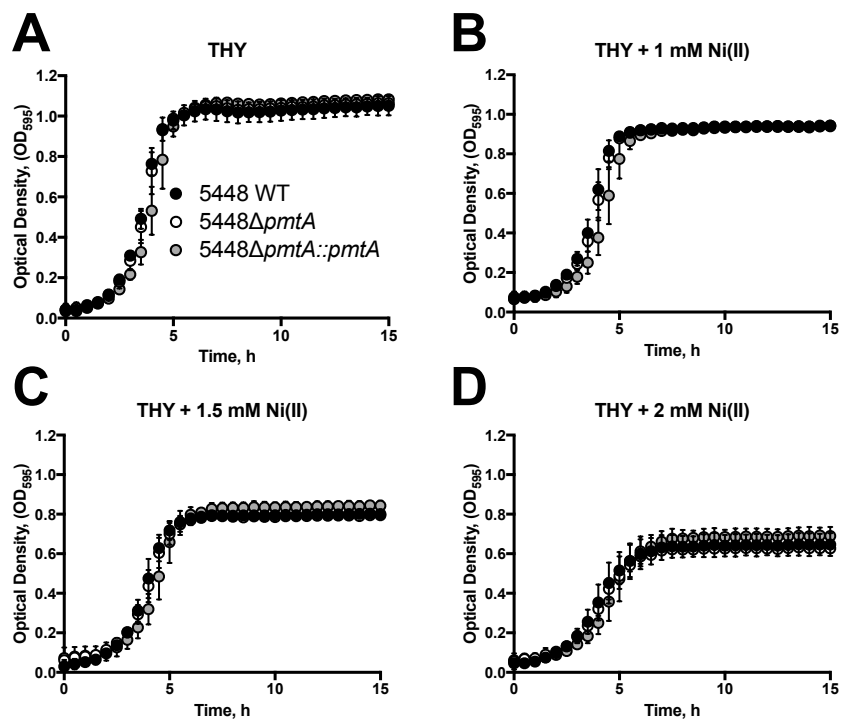

**Figure S4:** Growth analysis in the presence of Ni(II). Overnight cultures of 5448 WT (black circles), 5448Δ*pmtA* (open circles) and 5448Δ*pmtA*::*pmtA* (grey circles) were diluted to OD<sub>600</sub> = 0.05 into THY broth alone (A) or THY broth with 1 mM (B), 1.5 mM (C) or 2 mM (D) Ni(II). Growth was monitored at 37°C by optical density recording at 595 nm (OD<sub>595</sub>). Graphs represent mean ± standard deviation of 3 independent biological replicates.



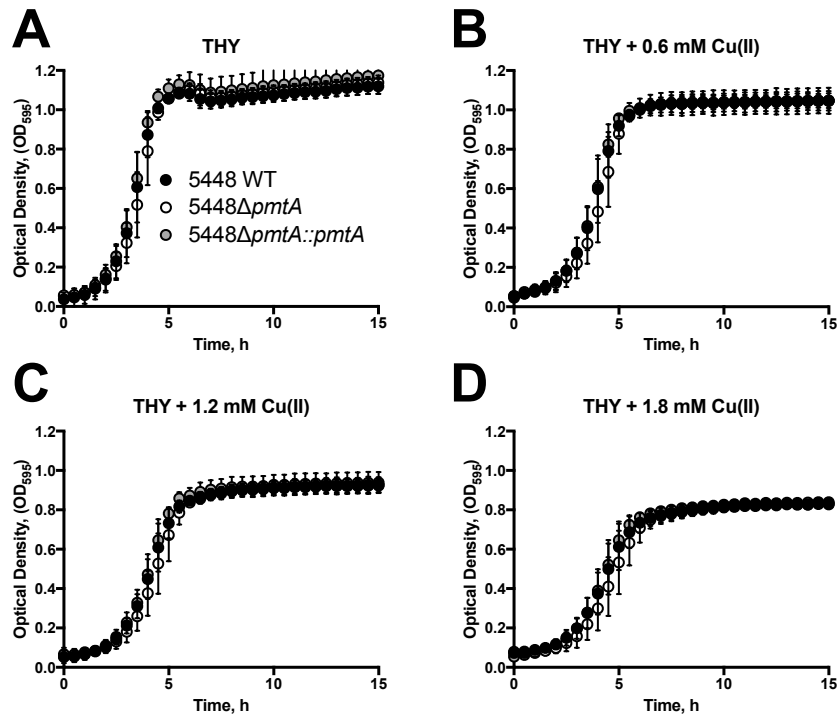

**Figure S5:** Growth analysis in the presence of Cu(II). Overnight cultures of 5448 WT (black circles), 5448Δ*pmtA* (open circles) and 5448Δ*pmtA*::*pmtA* (grey circles) were diluted to OD<sub>600</sub> = 0.05 into THY broth alone (A) or THY broth with 0.6 mM (B), 1.2 mM (C) or 1.8 mM (D) Cu(II). Growth was monitored at 37°C by optical density recording at 595 nm (OD<sub>595</sub>). Graphs represent mean ± standard deviation of 3 independent biological replicates.

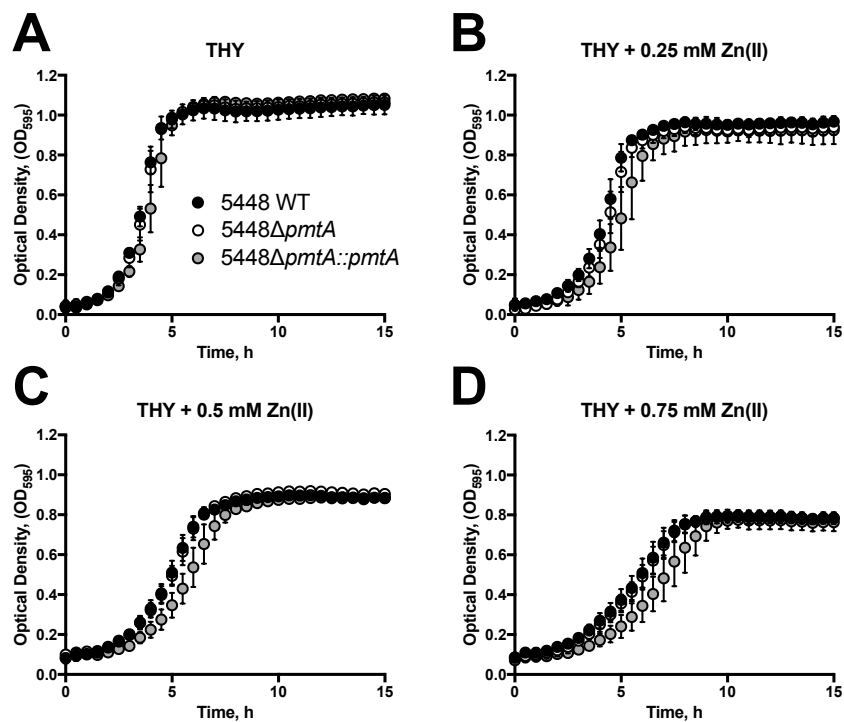

**Figure S6:** Growth analysis in the presence of Zn(II). Overnight cultures of 5448 WT (black circles), 5448Δ*pmtA* (open circles) and 5448Δ*pmtA*::*pmtA* (grey circles) were diluted to OD<sub>600</sub> = 0.05 into THY broth alone (A) or THY broth with 0.25 mM (B), 0.5 mM (C) or 0.75 mM (D) Zn(II). Growth was monitored at 37°C by optical density recording at 595 nm (OD<sub>595</sub>). Graphs represent mean ± standard deviation of 3 independent biological replicates.

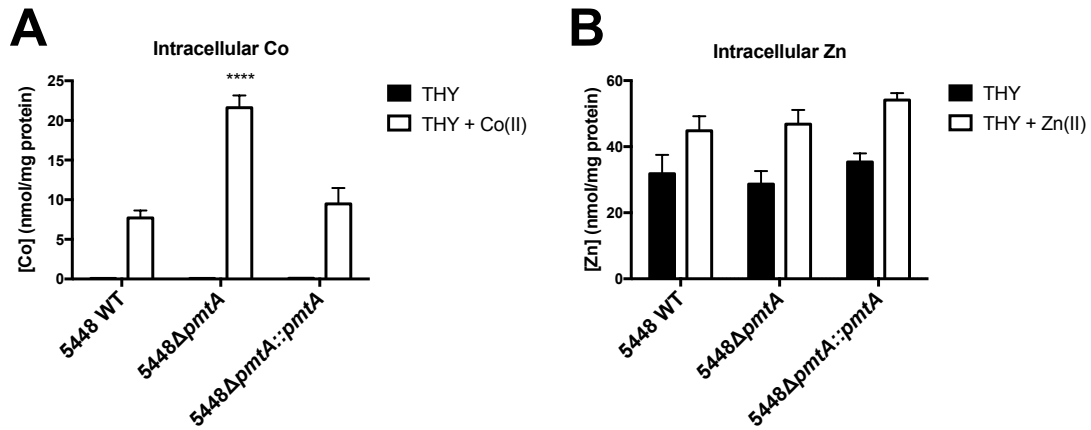

**Figure S7:** Intracellular metal accumulation of Co and Zn. Mid-exponential cultures ( $OD_{600}$  0.6-0.8) of 5448 WT, 5448Δ*pmtA* and 5448Δ*pmtA*::*pmtA* were challenged with either sterile water (black bars) or 0.50 mM Co(II) (A) or 1 mM Zn(II) (B) (white bars) for 1 h at 37°C. Cells were analyzed by inductively-coupled plasma mass spectrometry (ICP-MS). Total metal content was normalized to protein content of the sample. Graph represents mean + standard deviation of 3 independent biological experiments (2-way ANOVA used comparing all to 5448 WT of that condition, \*\*\*\*  $P < 0.0001$ )

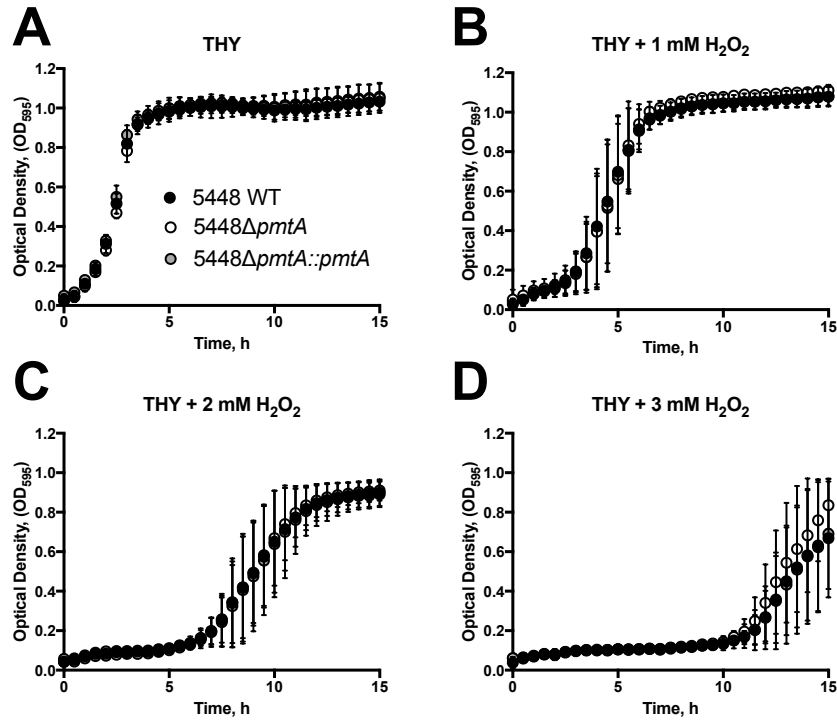

**Figure S8:** Growth curve analysis of strains 5448 WT (black circles), 5448Δ*pmtA* (open circles) and 5448Δ*pmtA*::*pmtA* (grey circles) in hydrogen peroxide. Strains were grown in THY to mid-exponential phase (OD 0.6-0.8) and diluted to OD<sub>600</sub> = 0.05 in THY broth (A) or THY broth containing 1 mM (B), 2 mM (C) or 3 mM (D) H<sub>2</sub>O<sub>2</sub>. Growth was monitored at 37°C by optical density recording at 595 nm (OD<sub>595</sub>). Graphs represent mean ± standard deviation of 3 independent biological replicates.

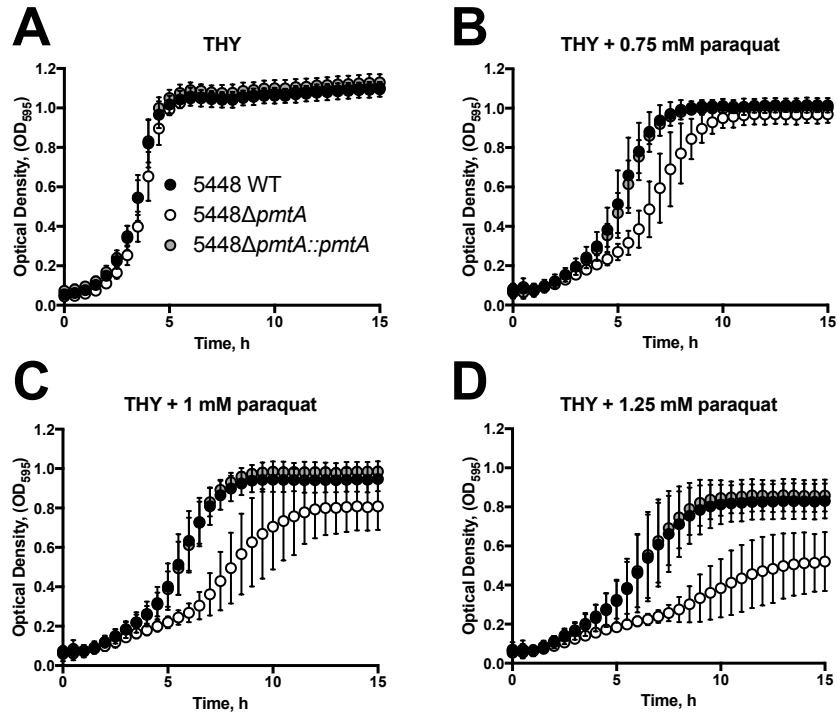

**Figure S9:** Growth analysis in the presence of the superoxide generator, paraquat.

Overnight cultures of 5448 WT (black circles), 5448 $\Delta$ *pmtA* (open circles) and 5448 $\Delta$ *pmtA::pmtA* (grey circles) were diluted to OD<sub>600</sub> = 0.05 THY broth alone (A) or THY broth with 0.75 mM (B), 1 mM (C) or 1.25 mM (D) paraquat. Growth was monitored at 37°C by optical density recording at 595 nm (OD<sub>595</sub>). Graphs represent mean  $\pm$  standard deviation of 3 independent biological replicates.

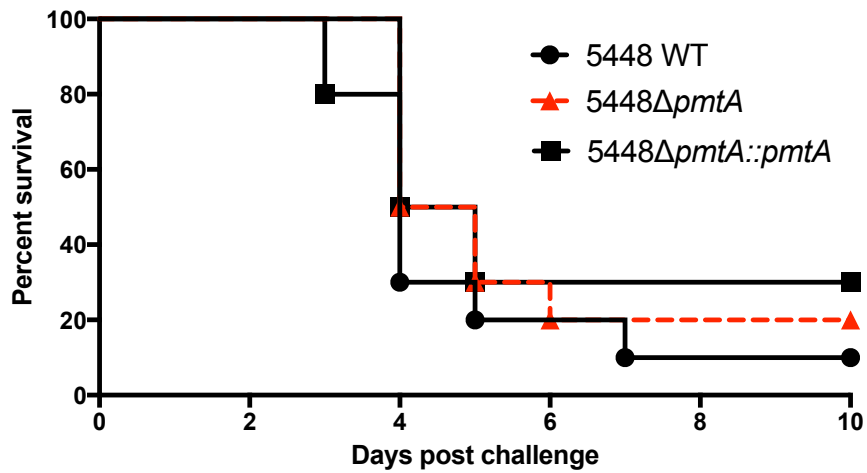

**Figure S10:** Virulence of 5448ΔpmtA in murine model of infection. Survival of mice after subcutaneous challenge of transgenic humanized plasminogen *AlbPLG1* C57BL/J6 mice with 5448 WT (black circles), 5448ΔpmtA (red triangles) and 5448ΔpmtA::pmtA (black squares). Infecting dose  $2 \times 10^8$  colony-forming units (CFU). Mantel-cox log rank test was performed comparing 5448ΔpmtA to 5448 WT ( $P = 0.5162$ ) and 5448ΔpmtA::pmtA ( $P = 0.9723$ ) (Graphpad Prism 7)

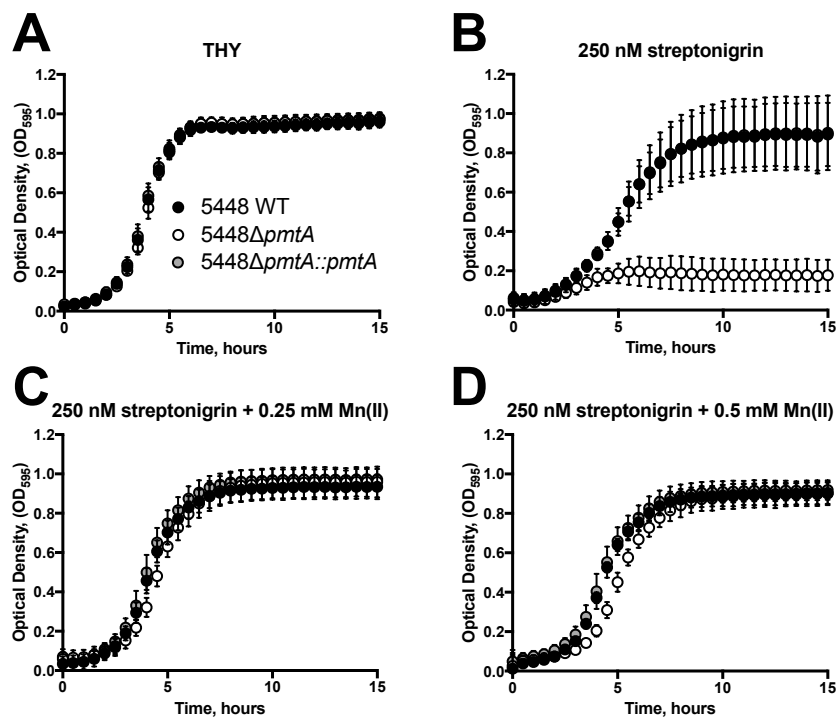

**Figure S11:** Growth curve analysis of streptonigrin rescue by Mn(II). Overnight cultures of strains 5448 WT (black circles), 5448 $\Delta$ *pmtA* (open circles) and 5448 $\Delta$ *pmtA::pmtA* (grey circles) were diluted to OD<sub>600</sub> = 0.05 in THY broth (A) or THY broth with 250 nM streptonigrin (B), 250 nM streptonigrin + 0.25 mM Mn(II) (C) or 250 nM streptonigrin + 0.5 mM Mn(II) (D). Growth was monitored at 37°C by optical density recording at 595 nm (OD<sub>595</sub>). Graphs represent mean  $\pm$  standard deviation of 3 independent biological replicates.

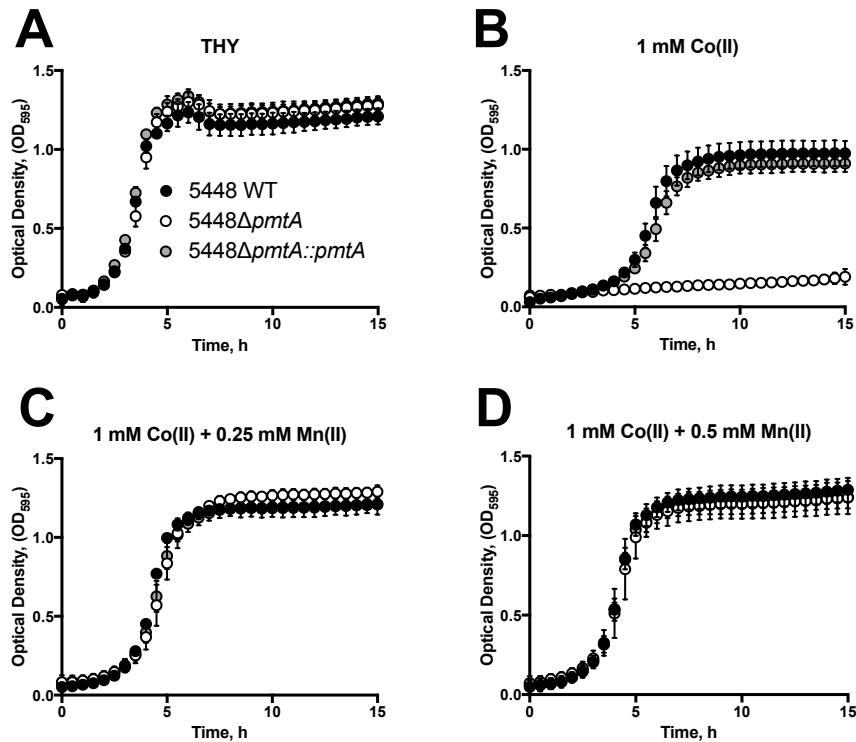

**Figure S12:** Growth curve analysis of Co(II) rescue by Mn(II). Overnight cultures of strains 5448 WT (black circles), 5448Δ*pmtA* (open circles) and 5448Δ*pmtA*::*pmtA* (grey circles) were diluted to OD<sub>600</sub> = 0.05 in THY broth (A) or THY broth with 1 mM Co(II) (B), 1 mM Co(II) + 0.25 mM Mn(II) (C) or 1 mM Co(II) + 0.5 mM Mn(II) (D). Growth was monitored at 37°C by optical density recording at 595 nm (OD<sub>595</sub>). Graphs represent mean ± standard deviation of 3 independent biological replicates.



1. **Brenot A, Weston BF, Caparon MG.** 2007. A PerR-regulated metal transporter (PmtA) is an interface between oxidative stress and metal homeostasis in *Streptococcus pyogenes*. *Mol. Microbiol.* **63**:1185-1196.
2. **McLaughlin HP, Bahey-El-Din M, Casey PG, Hill C, Gahan CG.** 2013. A mutant in the *Listeria monocytogenes* Fur-regulated virulence locus (frvA) induces cellular immunity and confers protection against listeriosis in mice. *J. Med. Microbiol.* **62**:185-190.
3. **McLaughlin HP, Xiao Q, Rea RB, Pi H, Casey PG, Darby T, Charbit A, Sleator RD, Joyce SA, Cowart RE, Hill C, Klebba PE, Gahan CG.** 2012. A putative P-type ATPase required for virulence and resistance to haem toxicity in *Listeria monocytogenes*. *PLoS One* **7**:e30928.
4. **Pi H, Patel SJ, Argüello JM, Helmann JD.** 2016. The *Listeria monocytogenes* Fur-regulated virulence protein FrvA is an Fe(II) efflux P-type ATPase. *Mol. Microbiol.* **100**:1066-1079.
5. **Gaballa A, Helmann JD.** 2002. A peroxide-induced zinc uptake system plays an important role in protection against oxidative stress in *Bacillus subtilis*. *Mol. Microbiol.* **45**:997-1005.
6. **Raimunda D, Long JE, Sassetti CM, Argüello JM.** 2012. Role in metal homeostasis of CtpD, a Co<sup>2+</sup> transporting P1B4-ATPase of *Mycobacterium smegmatis*. *Mol. Microbiol.* **84**:1139-1149.
7. **Zielazinski EL, Cutsail GE, Hoffman BM, Stemmler TL, Rosenzweig AC.** 2012. Characterization of a Cobalt-Specific P-1B-ATPase. *Biochemistry* **51**:7891-7900.
8. **Scherer J, Nies DH.** 2009. CzcP is a novel efflux system contributing to transition metal resistance in *Cupriavidus metallidurans* CH34. *Mol. Microbiol.* **73**:601-621.
9. **Raimunda D, Long JE, Padilla-Benavides T, Sassetti CM, Argüello JM.** 2014. Differential roles for the Co<sup>2+</sup>/Ni<sup>2+</sup> transporting ATPases, CtpD and CtpJ, in *Mycobacterium tuberculosis* virulence. *Mol. Microbiol.* **91**:185-197.
10. **Wertman KF, Wyman AR, Botstein D.** 1986. Host-vector interactions which affect the viability of recombinant phage lambda clones. *Gene* **49**:253-262.
11. **Chatellier S, Ihendyane N, Kansal RG, Khambaty F, Basma H, Norrby-Teglund A, Low DE, McGeer A, Kotb M.** 2000. Genetic relatedness and superantigen expression in group A *Streptococcus* serotype M1 isolates from patients with severe and nonsevere invasive diseases. *Infect. Immun.* **68**:3523-3534.
12. **Turner AG, Ong CL, Gillen CM, Davies MR, West NP, McEwan AG, Walker MJ.** 2015. Manganese homeostasis in Group A *Streptococcus* is critical for resistance to oxidative stress and virulence. *mBio* **6**:e00278-00215.
13. **Chaffin DO, Beres SB, Yim HH, Rubens CE.** 2000. The serotype of type Ia and III group B streptococci is determined by the polymerase gene within the polycistronic capsule operon. *J. Bacteriol.* **182**:4466-4477.
14. **Perezcasal J, Price JA, Maguin E, Scott JR.** 1993. An M-Protein with a Single C-Repeat Prevents Phagocytosis of *Streptococcus-Pyogenes* - Use of a Temperature-Sensitive Shuttle Vector to Deliver Homologous Sequences to the Chromosome of *S-Pyogenes*. *Mol. Microbiol.* **8**:809-819.
15. **Perez-Casal J, Caparon MG, Scott JR.** 1991. Mry, a trans-acting positive regulator of the M protein gene of *Streptococcus pyogenes* with similarity to

the receptor proteins of two-component regulatory systems. *J. Bacteriol.*  
**173**:2617-2624.
